# Supplementary material for: Continuity of transcriptomes among colorectal cancer subtypes based on meta-analysis
Source: Genome Biol. 2018 Sep 25;19:142. doi: 10.1186/s13059-018-1511-4 (PMC6154428; doi:10.1186/s13059-018-1511-4)
Supplement: Supplementary file 7 — Table S6. Meta-analysis of comparing continuous scores with CRIS subtypes. (XLSX 20 kb) [file 13059_2018_1511_MOESM7_ESM.xlsx]

## Sheet: Sheet1
Supplemental Table 6: Meta-analysis of comparing continuous scores with CRIS subtypes.
Sheet 1: effect sizes, p-values, and I^2 statistics from fitting regression models on individual datasets and fixed effect models with continuous scores on CRIS subtypes.
Variable	Study	n	PCSS1 effect size	PCSS1 standard error	PCSS2 effect size	PCSS2 standard error	PCSS1 I2	PCSS2 I2
CRIS-A subtype	GSE12225.GPL3676	42	0.184183	0.353496	-0.822383	0.404557	73.2544	49.7493
	GSE12945	62	0.497723	0.285743	-0.583424	0.295851
	GSE13067	33	0.553567	0.430738	-1.00151	0.512911
	GSE13294	155	0.579032	0.183078	-1.03948	0.217431
	GSE14095	189	0.412098	0.171255	-1.16222	0.199207
	GSE14333	157	0.0346437	0.170284	-1.35075	0.244814
	GSE17536	177	0.526122	0.173721	-1.08358	0.203626
	GSE17538.GPL570	63	0.375319	0.268995	-1.15292	0.329778
	GSE2109	427	-0.0754912	0.106567	-1.11296	0.13293
	GSE21510	123	0.708738	0.251425	-1.57831	0.311221
	GSE21815	131	0.781795	0.224287	-1.61941	0.303377
	GSE26682.GPL570	176	0.0392419	0.170434	-2.08495	0.322316
	GSE26682.GPL96	155	0.557905	0.192165	-1.40846	0.260858
	GSE33113	90	0.514355	0.237303	-1.10424	0.284652
	GSE39582	566	0.23264	0.0896308	-1.19746	0.118168
	GSE59857	155	-0.123328	0.221173	-2.11687	0.432223
	GSE76402	529	0.969192	0.119822	-1.94308	0.188832
	NHS.HPFS	718	0.496245	0.0890808	-1.17433	0.110889
	TCGA.COAD	122	0.591482	0.20937	-1.15368	0.250038
	TCGA.RNASeqV2	181	0.196286	0.163802	-1.21874	0.209001
CRIS-B subtype	GSE12225.GPL3676	42	0.0427252	0.399635	-0.84146	0.433847	41.9372	7.1324
	GSE12945	62	0.78274	0.330974	-0.48831	0.336206
	GSE13067	33	0.348593	0.441744	-0.73866	0.49978
	GSE13294	155	1.0547	0.290949	-0.738732	0.272625
	GSE14095	189	0.547339	0.215681	-1.02344	0.226798
	GSE14333	157	0.91332	0.275039	-0.491046	0.226635
	GSE17536	177	0.704888	0.20149	-0.644037	0.192759
	GSE17538.GPL570	63	1.13633	0.420195	0.00365956	0.347752
	GSE2109	427	0.587734	0.144605	-0.556588	0.139968
	GSE21510	123	0.79467	0.303486	-0.330013	0.265849
	GSE21815	131	0.780964	0.312491	-0.328588	0.287355
	GSE26682.GPL570	176	0.886727	0.232146	-0.340667	0.202857
	GSE26682.GPL96	155	2.34196	0.483396	0.0723848	0.249875
	GSE33113	90	0.976729	0.332293	-0.599484	0.297237
	GSE39582	566	1.10083	0.134051	-0.403816	0.116426
	GSE59857	155	0.49474	0.18863	-0.527345	0.207196
	GSE76402	529	0.668959	0.112219	-0.333791	0.111571
	NHS.HPFS	718	0.758592	0.111906	-0.331296	0.0989646
	TCGA.COAD	122	1.21078	0.311651	-0.536084	0.270474
	TCGA.RNASeqV2	181	1.08568	0.247094	-0.560254	0.20415
CRIS-C subtype	GSE12225.GPL3676	42	-0.682059	0.39963	0.654798	0.449985	70.5829	57.7574
	GSE12945	62	-2.29956	1.12871	0.962093	0.543495
	GSE13067	33	-1.91855	0.808884	0.300001	0.424458
	GSE13294	155	-0.591989	0.204562	1.15929	0.241868
	GSE14095	189	-0.549403	0.181131	1.03599	0.238801
	GSE14333	157	-0.579367	0.201469	1.01833	0.255785
	GSE17536	177	-0.686438	0.205679	1.39817	0.293675
	GSE17538.GPL570	63	-1.2455	0.443216	1.45178	0.517157
	GSE2109	427	-0.812656	0.136686	0.63222	0.132894
	GSE21510	123	-0.817933	0.278356	0.792788	0.272824
	GSE21815	131	-0.981486	0.241775	0.957897	0.254752
	GSE26682.GPL570	176	-0.30196	0.184533	1.31774	0.282171
	GSE26682.GPL96	155	-0.943895	0.229663	0.861017	0.229296
	GSE33113	90	-1.13551	0.328166	0.967387	0.335081
	GSE39582	566	-0.877095	0.128878	0.922502	0.128367
	GSE59857	155	-2.54446	0.493129	0.713368	0.216494
	GSE76402	529	-2.09943	0.231691	2.12402	0.229583
	NHS.HPFS	718	-0.68049	0.0972215	1.1976	0.126447
	TCGA.COAD	122	-0.835484	0.257272	1.10506	0.288887
	TCGA.RNASeqV2	181	-0.706345	0.205861	0.933993	0.243543
CRIS-D subtype	GSE12225.GPL3676	42	1.43388	0.698968	1.61671	0.698595	79.1981	24.5997
	GSE12945	62	-0.534689	0.53134	0.301785	0.402298
	GSE13067	33	1.19333	0.55693	0.936622	0.560057
	GSE13294	155	-0.178379	0.223876	0.611357	0.233358
	GSE14095	189	0.166109	0.191573	1.5427	0.371955
	GSE14333	157	0.751047	0.249205	0.844417	0.266512
	GSE17536	177	-0.10879	0.24355	0.829964	0.310962
	GSE17538.GPL570	63	-0.0672242	0.439475	0.212581	0.456378
	GSE2109	427	1.03395	0.149092	1.1054	0.177008
	GSE21510	123	-0.465885	0.283569	0.562206	0.287356
	GSE21815	131	0.414182	0.246631	0.498443	0.302201
	GSE26682.GPL570	176	0.0398633	0.202956	0.878211	0.271576
	GSE26682.GPL96	155	-0.499359	0.245764	0.286485	0.23557
	GSE33113	90	0.248992	0.276848	0.737208	0.35333
	GSE39582	566	0.013766	0.116349	0.956307	0.153702
	GSE59857	155	1.11737	0.262495	0.968758	0.233226
	GSE76402	529	0.0275586	0.131684	0.856001	0.20401
	NHS.HPFS	718	-0.0320928	0.103873	0.629036	0.122016
	TCGA.COAD	122	-0.529736	0.294704	0.707419	0.318931
	TCGA.RNASeqV2	181	-0.0363951	0.195911	1.31092	0.310159
CRIS-E subtype	GSE12225.GPL3676	42	-0.377382	0.416006	0.397575	0.456585	32.7596	0
	GSE12945	62	-0.951737	0.4989	0.503766	0.340443
	GSE13067	33	-1.10512	0.672238	0.546142	0.493351
	GSE13294	155	-1.67311	0.420578	0.208401	0.270342
	GSE14095	189	-0.578668	0.228255	0.516886	0.24856
	GSE14333	157	-1.02223	0.282827	0.563853	0.274308
	GSE17536	177	-0.925003	0.278002	0.558931	0.251077
	GSE17538.GPL570	63	-0.795036	0.504465	0.561975	0.48258
	GSE2109	427	-0.631359	0.158774	0.422144	0.15697
	GSE21510	123	-0.157265	0.274383	0.846072	0.336102
	GSE21815	131	-0.683101	0.287386	0.562132	0.290379
	GSE26682.GPL570	176	-0.555918	0.22608	0.555967	0.236188
	GSE26682.GPL96	155	-0.559006	0.254348	0.282754	0.23938
	GSE33113	90	-1.09788	0.419025	0.6811	0.39409
	GSE39582	566	-0.648692	0.151003	0.355131	0.134219
	GSE59857	155	-2.44688	0.634673	-0.074638	0.27899
	GSE76402	529	-1.04517	0.172975	0.292091	0.119039
	NHS.HPFS	718	-0.580268	0.114591	0.039274	0.106048
	TCGA.COAD	122	-0.468878	0.296005	0.2346	0.278335
	TCGA.RNASeqV2	181	-0.561574	0.23565	0.396999	0.244748

## Sheet: Sheet2
Table S6: Meta-analysis of comparing continuous scores with CRIS subtypes.
Sheet 2: model evaluation statistics, including p-values for likelihood ratio tests comparing models with only continuous scores or discrete subtypes to the full model with both scores and subtypes, and Akaike information criterion (AIC) for all three models (corresponding to Supplemental Fig. 11).
Variable	Study	p value (subtype)	p value (continuous scores)	AIC (full model)	AIC (subtype)	AIC (continuous scores)
msi	GSE13294_eset	3.21389e-20	0.268941	107.008	192.777	104.192
	GSE26682.GPL570_eset	5.33775e-09	0.405782	59.5302	93.6271	55.5318
	GSE26682.GPL96_eset	2.6541e-06	0.471175	80.5577	102.237	76.102
	GSE39582_eset	2.42281e-41	0.000708297	198.776	381.819	210.006
	TCGA.COAD_eset	5.40038e-14	0.924534	36.7627	93.8622	29.6629
	TCGA.RNASeqV2_eset	1.74566e-14	0.875963	85.7616	145.12	78.9746
	NHS.HPFS_eset	2.30839e-24	0.883043	482.019	586.87	475.189
summarylocation	GSE12945_eset	0.0445623	0.600516	66.7493	68.971	61.4992
	GSE14333_eset	4.71712e-05	0.370041	186.369	202.293	182.644
	GSE39582_eset	2.52105e-13	0.0144573	631.985	686.003	636.41
	TCGA.COAD_eset	0.00818034	0.0208384	132.149	137.761	135.721
	TCGA.RNASeqV2_eset	0.021056	0.27924	199.934	203.655	197.014
	NHS.HPFS_eset	2.99841e-05	0.000733002	906.509	923.338	917.663
summarystage	GSE12225.GPL3676_eset	0.000420159	0.852615	47.1719	58.7217	40.5232
	GSE12945_eset	0.515457	0.144466	90.6443	87.9697	89.4865
	GSE14333_eset	0.180048	0.62823	124.587	124.016	119.179
	GSE17536_eset	0.00793047	0.0302397	114.723	120.397	117.416
	GSE17538.GPL570_eset	0.472138	0.73079	40.3858	37.8868	34.4128
	GSE2109_eset	0.000822132	0.854579	466.587	476.794	459.927
	GSE21510_eset	0.980149	0.911504	88.7383	84.7784	81.727
	GSE21815_eset	0.365167	0.0720121	180.62	178.635	181.217
	GSE39582_eset	0.00213582	0.35957	223.134	231.432	219.493
	TCGA.COAD_eset	0.497141	0.03107	168.454	165.852	171.083
	TCGA.RNASeqV2_eset	0.127238	0.462991	254.192	254.316	249.791
	NHS.HPFS_eset	0.0810492	0.0717496	530.25	531.275	530.855
summarygrade	GSE12945_eset	0.249908	0.0438234	88.6085	87.3819	90.4146
	GSE17536_eset	0.0445484	0.74177	145.815	148.037	139.782
	GSE17538.GPL570_eset	0.316561	0.787624	34.666	32.9665	28.3831
	GSE2109_eset	0.102373	0.0313517	352.409	352.967	355.016
	NHS.HPFS_eset	0.0133967	0.072167	449.849	454.474	450.44
